# Supplementary material for: Rescuing Alu: Recovery of New Inserts Shows LINE-1 Preserves Alu Activity through A-Tail Expansion
Source: PubMed Central journal article supplement (PMC3415434; doi:10.1371/journal.pgen.1002842), 2012-08-09
Supplement: pgen.1002842.s002.pdf [file pgen.1002842.s002.pdf]

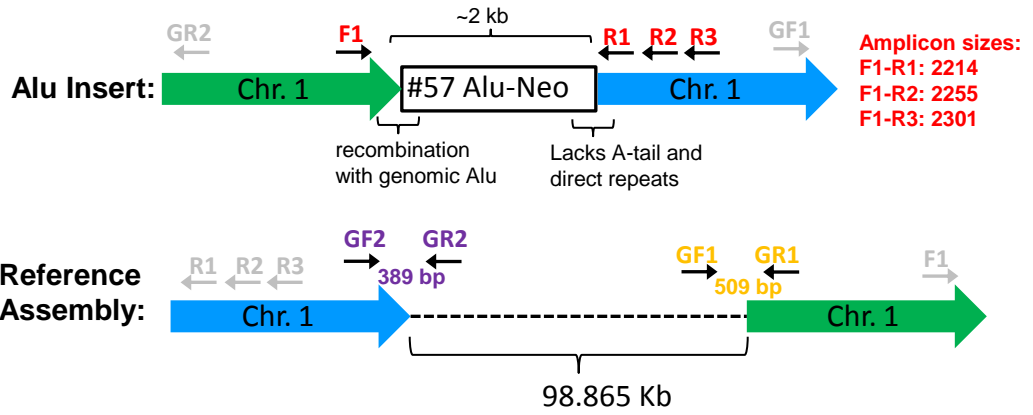

**A) HeLa (pre-transfection)**

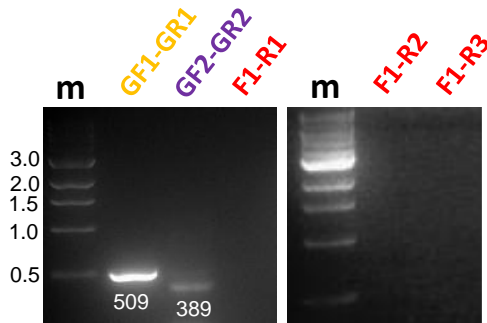

No evidence of preexistence of the rearrangement in HeLa (before transfection)

**B) Pooled colonies (post-transfection)**

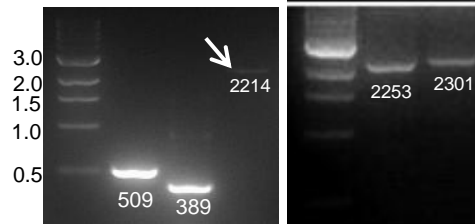

DNA from transfected cells after G418 selection (DNA used for the rescue strategy) shows evidence of the rearrangement

**C) Clone 57**

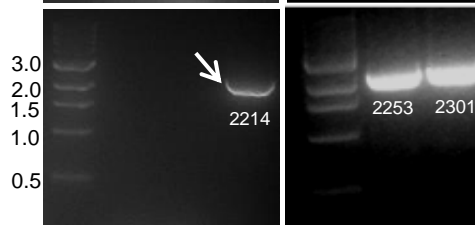

DNA from the isolated Alu clone 57 shows evidence of the rearrangement
