# Supplementary material for: Rescuing Alu: Recovery of New Inserts Shows LINE-1 Preserves Alu Activity through A-Tail Expansion
Source: PubMed Central journal article supplement (PMC3415434; doi:10.1371/journal.pgen.1002842), 2012-08-09

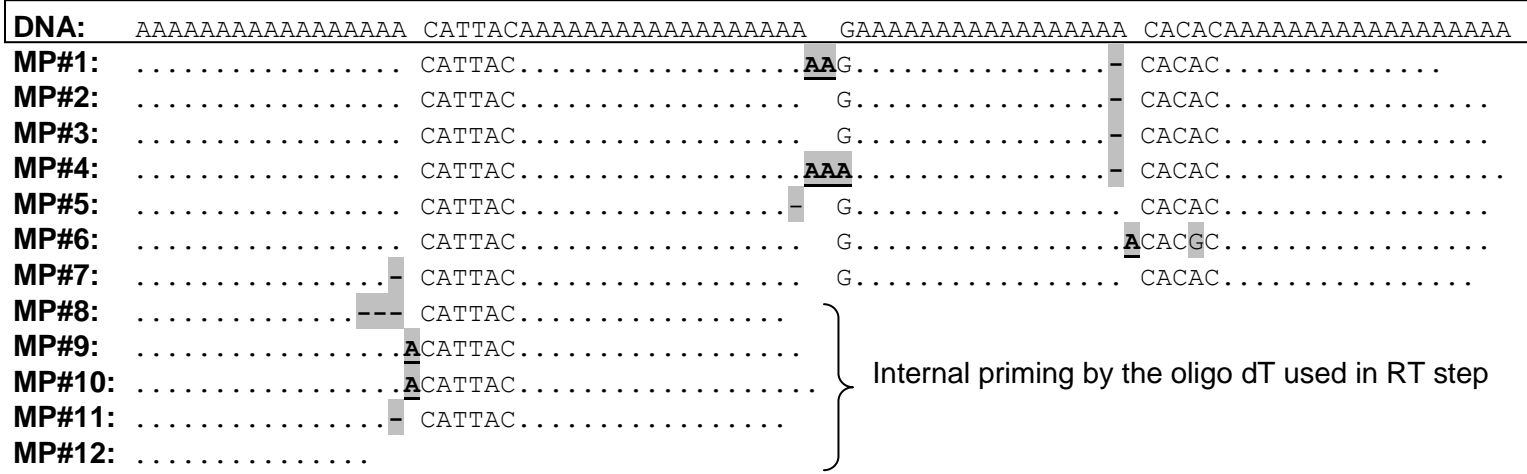

Supplement: pgen.1002842.s003.pdf [file pgen.1002842.s003.pdf]
