# Supplementary material for: Rescuing Alu: Recovery of New Inserts Shows LINE-1 Preserves Alu Activity through A-Tail Expansion
Source: PubMed Central journal article supplement (PMC3415434; doi:10.1371/journal.pgen.1002842), 2012-08-09
Supplement: pgen.1002842.s004.pdf [file pgen.1002842.s004.pdf]

|              |                            |                            |                       |                                |
|--------------|----------------------------|----------------------------|-----------------------|--------------------------------|
| <b>DNA:</b>  | AAAAAAAAAAAAAAAAAAAA       | CATTACAAAAAAAAAAAAAAAAAAAA | GAAAAAAAAAAAAAAAAAAAA | CACACAAAAAAAAAAAAAAAAAAAA      |
| <b>MP#1:</b> | ..... <u>A</u> CATTAC..... | .....                      | G.....                | <u>AAA</u> CACAC..... <u>A</u> |
| <b>MP#2:</b> | .....- CATTAC.....         | ..... <u>AAA</u>           | G.....                | CACAC..... <u>A</u>            |
| <b>MP#3:</b> | ..... CATTAC.....          | ..... <u>AA</u>            | G.....                | - CACAC.....                   |
| <b>MP#4:</b> | ..... <u>A</u> CATTAC..... | .....-                     | G.....                | - CACAC.....                   |
| <b>MP#5:</b> | .....- CATTAC.....         | .....-                     | G.....                | <u>A</u> CACAC.....            |
| <b>MP#6:</b> | ..... <u>A</u> CATTAC..... | .....                      | G.....                | <u>AA</u> CACAC..... <u>A</u>  |
| <b>MP#7:</b> | ..... CATTAC.....          | .....                      | G.....                | CACAC.....                     |
