# Supplementary material for: Rescuing Alu: Recovery of New Inserts Shows LINE-1 Preserves Alu Activity through A-Tail Expansion
Source: PubMed Central journal article supplement (PMC3415434; doi:10.1371/journal.pgen.1002842), 2012-08-09
Supplement: pgen.1002842.s009.pdf [file pgen.1002842.s009.pdf]

# BC1 and B2 RESCUES

GRCh37/hg19 assembly

## CLONE 1 BC1

[MP#1]

Driver: ORF2

Plasmid: BC1rescueA70D A<sub>17</sub>CATTACA<sub>18</sub>GA<sub>17</sub>CACACA<sub>18</sub> (T)

Chromosome: 14

5' position: 50329568

DR: unable to determine

ENDOfsite: unable to determine

Empty site:

```
GAAAACAAACAGTTGCCCCAGGCTTCCTTCGTTTCGAATAGTGAAGACTGAGCTGGCCTCGGCACTGTGCAGA
CTCCCAACCTGTGCTACTGTGGGTTATTCTCCTTATAGTGCAGTCACCTCCTAAATGCTTGCTGAAAATAAT
GGAAGACTTCGAGCCAGATGTTTGCCTCTTAAGTAACGTCCCCCAAAGATGCAGCACATATTTAAGCCTG
CTGAAGCAAGCAACGCTGACGGACCAGGTTATTGCGTTTTTCTCTCGCTGCGTGTCCGGACGCCACACTATG
AGCATTAAAGCGCATACTGACCAATTTCTGTTAAGCAGGAACGTGGTGTCTGATCAAAACACAGGGAGCCGC
GGCCGCAACCGCGCCGATAAGCTTCCGGGGTCCCAACCCTGTAAGGCAGAACGGCTGCCAGCTCGGATGAC
GCCACACTAACGTAGCCTCCAGACCGCCAGTGTGGGTGTGTCCAAGCTCACGTGCGCCGGCGTGGCCCCC
CGCTCCCCAATGACGTAAGTGCCTGCAGCTTCTAGTAGCTTTTTCGAGCGTCTCCGACG↓GCCGGGCGCGG
TGGCGCGTGCCTGTAGTCCCAGCTACTCGGGAGGCTGAGGTGGGAGGATCGCTTGAGCCCAGGAGTTCTGGG
CTGTAGTGCCTATGCCGATCGGGTGTCCGCACTAAGTTCGGCATCAATATGGTGACCTCCCGGGAGCGGGG
GACCACCAGGTTGCCTAAGGAGGGGTGAACCGGCCAGGTGCGAAACGGAGCAGGTCAAACTCCCGTGCTG
ATCAGTAGTGGGATCGCGCTGTGAATAGCCACTGCACTCCAGCCTGAGCAACATAGCGAGACCCCGTCTCT
TTTGCCCCCTCCCTCATTAAAGGTACCTTTGTAAGTAAATAGTGTCTTTGAAGTTAAGAAGTTTGCCTCCT
TTCCGGTTCATACGTATTAAGAAACATACTAATGTGCACATTTAA
```

Filled site:

```
GAAAACAAACAGTTGCCCCAGGCTTCCTTCGTTTCGAATAGTGAAGACTGAGCTGGCCTCGGCACTGTGCA
GACTCCCAACCTGTGCTACTGTGGGTTATTCTCCTTATAGTGCAGTCACCTCCTAAATGCTTGCTGAAAA
TAATGGAAGACTTCGAGCCAGATGTTTGCCTCTTAAGTAACGTCCCCCAAAGATGCAGCACATATTTAA
GGCCTGCTGAAGCAAGCAACGCTGACGGACCAGGTTATTGCGTTTTTCTCTCGCTGCGTGTCCGGACGCC
ACACTATGAGCATTAAAGCGCATACTGACCAATTTCTGTTAAGCAGGAACGTGGTGTCTGATCAAAACAC
AGGGAGCCGCGCCGCAACCGCGCCGATAAGCTTCCGGGGTCCCAACCCTGTAAGGCAGAACGGCTGCC
AGCTCGGATGACGCCACACTAACGTAGCCTCCAGACCGCCAGTGTGGGTGTGTCCAAGCTCACGTGCC
CGGCGTGGCCCCCGCTCCCCAATGACGTAAGTGCCTGCAGCTTCTAGTAGCTTTTTCGAGCGTCTCC
GACTGGGGTTGGGGATTTAGCTCAGTGGTAGAGCGCT... [NEOcassette] AAAAAAAAAAAAAAAAAA
AAAAAAAAAAAAAAAAAAAAAAAA
```

Note: we were unable to recover the 3' flank to verify direct repeats and endonuclease cleavage site.

## CLONE 2 BC1

[MP#1, 5, 34, 35, 36, 38]

Driver: ORF2

Plasmid: BC1rescueA70D A<sub>17</sub>CATTACA<sub>18</sub>GA<sub>17</sub>CACACA<sub>18</sub> (T)

Chromosome: 12

5' position: 96192169

DR: AAGATTACAATGCA

ENDOsites: TCTT/GT

Empty site:

```
AAATCAAGCTTAAAAAAGCTCACAACTACTGAAGCAGCAATTTGATTAAAAACATCCCTTGTCCATAGGTG
GGATTTCAAGATATGTAATATAGTAGAATATGTTCAAGATGTTAATTAAGCTAGATATGCTTCTGGTTTGGT
TTTATCTATAGCTCCTAATTACCCTGGACACTTTCCGATCCTAAACCTGTGCTGCAATTTCAAACACAAGTG
CCTTTCTGAATATTTTTATTACAATTGTGCCTTAC ↑ AAGATTACAATGCA ↓ ATTTAGAGGGTAAATCTATGA
CACAACTGCTTCAACCCTAAATTCAGTATAATTGACCTCATCATAGAAGAGGCATTTCAGTTATCAGAAACA
TTAGAAAACTTCATTAACCAGTATTTAAACTGTACCATCTCAGAGCTCAAATTAATGGTTTCAGGATGTTA
ATACATTTTGAAAACCTGTAAATGAATTTTAAGCAAATTTGGTTTGGGAAGGCCGAGGTGGGTGGATTACATGA
CGTCAGGAGTTTGAGACCTGCCTGGCCAACATGGTGAAACCCCGTCTCTACTAAAAATACAAA
```

Filled site:

```
AAATCAAGCTTAAAAAAGCTCACAACTACTGAAGCAGCAATTTGATTAAAAACATCCCTTGTCCATAGGTG
GGATTTCAAGATATGTAATATAGTAGAATATGTTCAAGATGTTAATTAAGCTAGATATGCTTCTGGTTTGGT
TTTATCTATAGCTCCTAATTACCCTGGACACTTTCCGATCCTAAACCTGTGCTGCAATTTCAAACACAAGTG
CCTTTCTGAATATTTTTATTACAATTGTGCCTTACAAGATTACAATGCAGGGGTTGGGGATTTAGCTCAGTG
GTAGAGCGCTTGCCTAGCAAGCGCAAGGCC... [NEOcassette] AAAAAAAAAAAAAAAAAAAAAAAAAAAAA
AAAAAAAAAAAAAAAAAAAAAAAAAAAAAAAAAAAAAAAAAAGATTACAATGCAATTTAGAGGGTAAATCTATGACACAAT
CTGCTTCAACCCTAAATTCAGTATAATTGACCTCATCATAGAAGAGGCATTTCAGTTATCAGAAACATTAGAA
AACTTCATTAACCAGTATTTAAACTGTACCATCTCAGAGCTCAAATTAATGGTTTCAGGATGTTAATACAT
TTTGAAAACCTGTAAATGAATTTTAAGCAAATTTGGTTTGGGAAGGCCGAGGTGGGTGGATTACATGACGTCAG
GAGTTTGAGACCTGCCTGGCCAACATGGTGAAACCCCGTCTCTACTAAAAATACAAA
```

## CLONE 3 B2

[MP# 19; 20]

Driver: ORF2

Plasmid: B2rescueA70D A<sub>17</sub>CATTACA<sub>18</sub>GA<sub>17</sub>CACACA<sub>18</sub> (T)

Chromosome: 1

5' position: 151124725

DR: AAAAATACAAAAAATT

ENDOsites: TTTT/AA

### Empty site:

```
CTTTTATCTTTTTATCCCCAGCACTTAATTGTAATGCCTGGCATAACAGTAAGTAGAGGAAGAAATAAATGCA
TCAAAGATTAAAAACAAACAAACATCCTATGGCTCAGAGGAAAAACAACAACAACAACAAAAACAAAAACA
AAAAAAAAACAAGCCAGGTATGGTGGCTCATTTCTGTAATCCCAGCATTTTGGGAGGCCAAGGCAGGCGAAT
CATGAGGTCAGGAGATCGAGACCATCCTGGCTAACATGGTGAAACCCCGTGTTCGATT †AAAAATACAAAAA
TT † AGCTGGGCGTGGTAGCGCGCGCCTGTAATCCCAGCTACTCAGGAGGCTGAGGCAGGAGAATAGCTTGAA
CCTGGGAGGCAGAGGTTGCAGTGAGCCGAGATCGTGCCACTGCACTCCAGCCTGGGCGACAGAGTGAGACTC
CATCTCAAAAAAGTAAATAAATAAAAAATAGGACAGGCACGGTGGTTCACACCTGTAATCCCAGCACTTCGGG
AGGCCGAGCTGGGCGAATCATGAGGTCAGGAGTTCAAGACCAGCCTGGCCAACATAGTGAAACCCCGTCTCT
ACTAAAAATACAAAA
```

### Filled site:

```
CTTTTATCTTTTTATCCCCAGCACTTAATTGTAATGCCTGGCATAACAGTAAGTAGAGGAAGAAATAAATGCA
TCAAAGATTAAAAACAAACAAACATCCTATGGCTCAGAGGAAAAACAACAACAACAACAAAAACAAAAACA
AAAAAAAAACAAGCCAGGTATGGTGGCTCATTTCTGTAATCCCAGCATTTTGGGAGGCCAAGGCAGGCGAAT
CATGAGGTCAGGAGATCGAGACCATCCTGGCTAACATGGTGAAACCCCGTGTTCGATTAAAAATACAAAAAAT
TGGGCTGGTGAGATGGCTCAGTGGGTTAGAGCACCCGACTGCTCTTCCGAAGGTCCAGAGTTCAAATTCAG
CAACCACATGGTGGCTCACAACCATCCGTAACAAGATCTGACTCCCTCTTCTGGAGTGTC... [NEOcassett
e] AAAAAAAAAAAAAAAAAAAAAAAAAAAAAAAAAAAAAAAAAAAAAAAAAAAAAAAAAAAAAAAAAAATACAAAAAATTAGCTGGGCGGGG
TAGCGCGCGCCGTAATCCCAGCTACTCAGGAGGCTGAGGCAGGAAAATAGCTTGAACCTGGGAGGCAAAGG
TTGCAGTGAGC
```

## CLONE 4 B2

[MP# 48]

Driver: ORF2

Plasmid: B2rescueA70D A<sub>17</sub>CATTACA<sub>18</sub>GA<sub>17</sub>CACACA<sub>18</sub> (T)

Chromosome: 9

5' position: 20623400

DR: AAGACTCCCGGTT

ENDOsites: TCTT/AA

### Empty site:

AAGAAAGGGACAAAGAGGAAAGAAAGAGGGACAAAGAGGAAAGGCAAGGAGAAGAGAAGGAAAAATCAAGGT  
TCAGCAAGAAGTTGGAAGGCGAGGGAAAAAGGGGAGTAAAGAGAAGGCAAAAGAGGTCTAAGGGCTAGGAAG  
ATGCAAGGATCTTTTTTTAAACGAACCAAAGTCACATCCATCTTTCACTTTCAAATCAATCGTCTAGATCTTA  
TCCGTTTCCTTTTTAAAGGTTATCTGCGTCTGTAAAGGAAGCCAGTAGTTGATACTCCTCTCCGCGCCCCAC  
GCGTGGCCGCGCTGTTCTATCTCCGGCCACTGAGATCAAATACAACGCGAGTGAGAACATTTGCAGAGGCGC  
GACTCTGGGAACACTCCTGCGACTGGCTGTCAACCGGGAGTCTAACCGGATTAATACTCAGAGATGGATTAC  
GCTGGTTGTCACCAATACGCCTAAAGATTATAATCCAATTTACGCAAATTACAGTCAGTATTAACCTTTATCT  
GCTATTTT↑AAGACTCCCGGTT↓GCCCCGCGCTCCTCAGAGGACAATCCTCCAGTTCTGATGCAACTCAG  
TAGGCTGTCAAGAGGGGAAGCCCCCGAAGAAAACAACCTCAAGCCTGGTCCCCGAGGGTCTGTACCCGGCA  
CTCCAGGTGTCTTGCTTTACCTGGGCACCGCTTTATGAAGCTTCCAGCCGGGGATTACCAAAGCGGAAG  
GCGTTCCCTTGCAAGGAAATAGCATCCTTGTTTCTCCCTTGTTTCATTTTCAATTTTTCGGTGGCGGT  
GGCAGAAGGGCGGGGAGTGAGGGTGGCGGGCGGGT

### Filled site:

AAGAAAGGGACAAAGAGGAAAGAAAGAGGGACAAAGAGGAAAGGCAAGGAGAAGAGAAGGAAAAATCAAGGT  
TCAGCAAGAAGTTGGAAGGCGAGGGAAAAAGGGGAGTAAAGAGAAGGCAAAAGAGGTCTAAGGGCTAGGAAG  
ATGCAAGGATCTTTTTTTAAACGAACCAAAGTCACATCCATCTTTCACTTTCAAATCAATCGTCTAGATCTTA  
TCCGTTTCCTTTTTAAAGGTTATCTGCGTCTGTAAAGGAAGCCAGTAGTTGATACTCCTCTCCGCGCCCCAC  
GCGTGGCCGCGCTGTTCTATCTCCGGCCACTGAGATCAAATACAACGCGAGTGAGAACATTTGCAGAGGCGC  
GACTCTGGGAACACTCCTGCGACTGGCTGTCAACCGGGAGTCTAACCGGATTAATACTCAGAGATGGATTAC  
GCTGGTTGTCACCAATACGCCTAAAGATTATAATCCAATTTACGCAAATTACAGTCAGTATTAACCTTTATCT  
GCTATTTTAAAGACTCCCGGTTGGCTGGTGAGATGGCTCAGTGGGTTAGAGCACCCGACTGCTCTTCCGAAG  
GTCCAGAGTTCAAATTCAGCAACCACATGGTGGCTCACAACCATCCGTAACAAGATCTGACTCCCTCTTCT  
GGAGTGTC... [NEOcassette] AAAAAAAAAAAAAAAAAAAAAAAAAAAAAAAAAAAAAAAAAAAAAAAAAAATTAC  
AAAAAAAAAAAAAAAAAAAAAAAAAAAAAAAAAAGACTCCCGGTTGCCCCGCGCTCCTCAGAGGACAATCCTCCAC  
GTTCTGATGCAACTCAGTAGGCTGTCAAGAGGGGAAGCCCCCGAAGAAAACAACCTCAAGCCTGGTCCCCG  
AGGGTCTGTACCCGGCACTCCAGGTGTCTTGCTTTACCTGGGCACCGCTTTATGAAGCTTCCAGCCGGG  
GATTACCAAAGCGGAAG

## CLONE 5 B2

[MP# 11, 41]

Driver: ORF2

Plasmid: B2rescueA70D A<sub>17</sub>CATTACA<sub>18</sub>GA<sub>17</sub>CACACA<sub>18</sub> (T)

Chromosome: 3

5' position: 70268177

DR: AAAAAAGAATGTTCA

ENDOsites: TTTT/AA

### Empty site:

```
ATTTTCTTTTGCTTCCTTTTCGGTACCCAGGGTGTGGTTGCTGGAACGTTTACAGCCACAGCAGCTGCAGTAG
TGGCCTGAGTAGACTTTTTCCTCAGAGTTTCTATAGTGGTAACAGGATTAACAGACTCTATTCTGGAAGTACT
TGGGTGGCATAACACCTCCCAGCAGAACTATTCTGACAAGGATGTGCAGATGGAAATGCATATTTATGTCA
CTTAAAGCCTACAAGAGACACAAGGATTTGAGCTATAACAATAAATAGAAAAAAAAAATTCTTCAGCATTTTT
GGTAACCCATACTCAAGTGCATTGACTGTGCTTGGCGAAAGACCTACAGTTTGCTCTTTGTCCAAGCATAAAA
ATATTCAGCATTCAAGCATGTTGAGGTGAACATTTCTGAATATATTTTAGAGTGTTAAAATAAGCTACCACA
AAGTTAGTTTAAAATTTTCAGGTCTTAAAAATAACAGGACAATTTTATGAAGTGTTTGGGCCATTTCAAGAAA
AAAAAAGTCCCCTTT↑AAAAAGAATGTTCA↓TTTGTTCCAATTTTTTAGTAAAGGCAGGTTTAAAAAATTA
TTTCTAAACACCAAATAGTCATTATAGTCAAGGCTTTCAAGTTTAAAGGTATTGTCTGCATCACAGTCCTTGA
AACAGCCTCTCCTAGCTTTCTTCTAAACACCTTTAAAAATATGGAAAAACAAGAATGCTCACATCTGCAAAA
TTTGGGTTTGATAGTATTGGGAAAGATTTACACTAAATATCAACCCATTAGAATTGAACTGAATAATCCAAT
CAGTCTAGCACTTACAGAGCTCTGCTGAAAGTAGAATGGAATTA
```

### Filled site:

```
ATTTTCTTTTGCTTCCTTTTCGGTACCCAGGGTGTGGTTGCTGGAACGTTTACAGCCACAGCAGCTGCAGTAG
TGGCCTGAGTAGACTTTTTCCTCAGAGTTTCTATAGTGGTAACAGGATTAACAGACTCTATTCTGGAAGTACT
TGGGTGGCATAACACCTCCCAGCAGAACTATTCTGACAAGGATGTGCAGATGGAAATGCATATTTATGTCA
CTTAAAGCCTACAAGAGACACAAGGATTTGAGCTATAACAATAAATAGAAAAAAAAAATTCTTCAGCATTTTT
GGTAACCCATACTCAAGTGCATTGACTGTGCTTGGCGAAAGACCTACAGTTTGCTCTTTGTCCAAGCATAAAA
ATATTCAGCATTCAAGCATGTTGAGGTGAACATTTCTGAATATATTTTAGAGTGTTAAAATAAGCTACCACA
AAGTTAGTTTAAAATTTTCAGGTCTTAAAAATAACAGGACAATTTTATGAAGTGTTTGGGCCATTTCAAGAAA
AAAAAAGTCCCCTTTAAAAAGAATGTTCAGGGCTGGTGGATGGCTCAGTGGGTTAGAGCACCCGACTGCT
CTTCCGAAGGTCCAGAGTTCAAATTCAGCAACCACATGGTGGCTCACACCATCCGTAACAAGATCTGACT
CCCTCTTCTGGAGTGTC... [NEOcassette] AAAAAAAAAAAAAAAAAAAAAAAAAAAAAAAAAAATTACAAAAAAA
AAAAAAAAAAAAAAAAAAAAAAAAAAAAAAAAAAAAAAAAAAAAAAAAAAAAAAAAAAAAAAAAAAAAAGAATGTTCA
TTTGTTCCAATTTTTAGTAAAGGCAGGTTTAAAAAATTTATTTCTAAACACCAAATAGTCATTATAGTCAAG
GCTTTCAAGTTTAAAGGTATTGTCTGCATCACAGTCCTTGA
```

## CLONE 6 B2

[MP# 13]

Driver: ORF2

Plasmid: B2rescueA70D A<sub>17</sub>CATTACA<sub>18</sub>GA<sub>17</sub>CACACA<sub>18</sub> (T)

Chromosome:7

5' position: 2843712

DR: AAGAGGACGAGATTTTCG

ENDOsites: TCTT/AA

### Empty site:

AAAAAAAAAAAAAAAAAGAGGACGATTTTCGTTCCCCCTTGTACTAGTGTGGTTCATGTAGTGAAATTTTTTA  
GTGAAGGGAGATTCCGAGACTTATCCTGACCCCTGGAAGAACAGGAGAGGAAGAAGTTGGTCTGCCCATGGC  
CATGGCTGGCGGGTGGGGGTTGGGGAGATGATTCCAGGAGTTTCCAGCCTGCTGGCTTGTGAGTTTTGAAAT  
GGAGCCCTGGATTTTCACTTTCCAGTTCCAGGAGATCTGGGGAAATCTGGATTGGTTTGGAGTTGTTTTTTG  
TTTTTTGTTTTGTTTTGTTTTGTTTTGGACTTTTAGGAAAACCTTTTCAAGGCAGCTGAAAAAGCTAATG  
ATGATAATTTGCTTCTCCTATGCCATTCTAAACCCAGAGTTTTCTCTGCAGTTCCATCTCCTCTTGAGAAG  
CTTTTCCCCCTTAGAATGATATTTTGTGTGTTTGTGTTCTCAAGTTTTGCTGATCTTTTCTGTACTT † AAGA  
GGACGATTTTCG † TTTCCCCCTTGTACTAGTGTGGTTCATGTAGTGAAATTTTTAGTGAAGGGAGATTCCGAGA  
CTTATCCTGACCCCTGGAAGAACAGGAGAGGAAGAAGTTGGTCTGCCCATGGCCATGGCTGGCGGGTGGGGG  
TTGGGGAGATGATTCCAGGAGTTTCCAGCCTGCTGGCTTGTGAGTTTTGAAATGGAGCCCTGGATTTTCACT  
TTCCAGTTCCAGGAGATCTGGGGAAATCTGGATTGGTTTGGAGTTGTTTTTTGTTTTGTTTTGTTTTGTTTTG  
TTTTTTTTGGACTTTTAGGAAAAC

### Filled site:

AAAAAAAAAAAAAAAAAGAGGACGATTTTCGTTCCCCCTTGTACTAGTGTGGTTCATGTAGTGAAATTTTTTA  
GTGAAGGGAGATTCCGAGACTTATCCTGACCCCTGGAAGAACAGGAGAGGAAGAAGTTGGTCTGCCCATGGC  
CATGGCTGGCGGGTGGGGGTTGGGGAGATGATTCCAGGAGTTTCCAGCCTGCTGGCTTGTGAGTTTTGAAAT  
GGAGCCCTGGATTTTCACTTTCCAGTTCCAGGAGATCTGGGGAAATCTGGATTGGTTTGGAGTTGTTTTTTG  
TTTTTTGTTTTGTTTTGTTTTGTTTTGGACTTTTAGGAAAACCTTTTCAAGGCAGCTGAAAAAGCTAATG  
ATGATAATTTGCTTCTCCTATGCCATTCTAAACCCAGAGTTTTCTCTGCAGTTCCATCTCCTCTTGAGAAG  
CTTTTCCCCCTTAGAATGATATTTTGTGTGTTTGTGTTCTCAAGTTTTGCTGATCTTTTCTGTACTTAAAGAG  
GACGATTTTCG**GGGCTGGTGGATGGCTCAGTGGGTTAGAGCACCCGACTGCTCTTCCGAAGGTCCAGAGTTT**  
**AAATTCCAGCAACCACATGGTGGCTCACAAACCATCCGTAACAAGATCTGACTCCCTCTTCTGGAGTGTC... [N**  
**EOcassette] AAAAAAAAAAAAAAAAAAAAAAAAAAAAAAAAAAAAAAAAAAAAAAAAAAAAAAAAAAAAAAAAAA**  
**AAAAAAAAAAAAAAAAAAAAAAAAAAAAAAAAAAAAAAAAAAAAAAAAAAAAAAAAAAAAAAAAAAAAAAAA**  
AAAAAAAAAAAAAAAAAGAGGACGAGATTTTCGTTCCCCCTTGTACTAGTGTGGTTCATGTAGTGAAATTTTTTA  
TGTAGTGAAATTTTTAGTGAAGGGAGATTCCGAGACTTATCCTGACCCCTGGAAGAACAGGAGAGGAAGAAG  
TTGGTCTGCCCATGGCCATGGCTGGCGGGTGGGGGTTGGGGAGATGA

## CLONE 7 B2

[MP# 16, 42]

Driver: ORF2

Plasmid: B2rescueA70D A<sub>17</sub>CATTACA<sub>18</sub>GA<sub>17</sub>CACACA<sub>18</sub> (T)

Chromosome:3

5' position: 133956392

DR: AAGAACCATTAGTT

ENDOsites: CCTT/AA

### Empty site:

AGGTAGCATTGTCATTAGAATGCACAGAATTTTTAAATTCTGATTTAGGATGAAAATACTTCAGCTGTTT  
AGTTACATTAACCAGACTTAAATTTCCCATTTGCCAATTTCCAGCAAAGGAAAAATGTTGCTCTCTTGTAGAA  
AGCATGGCATTGTCATAAAATTTTATTTTTAAACAACACTCAAATTTCAAAGCTAAAAAACCAAAGTTATTCTTG  
CAAACCTCTTAAGGCTTATCAAAAAAATTCATTTTTCCCTAGACGATTTAAGTTCAAATTTATTTCAAGG  
TCTGTGATCCACATGAAGTGGCCTAACTCAAGTTCTAATAAATTCACAGTTCAAATTTTCCAAATGAT  
TTTTAAAGTTGACTATTGGTTTCTCAAAGCTGTACATATGGTTTCATTTCGTGCTAAATCAGCAAACCATCTCT  
CTTTATTTTTAAAGCCACCTTTATAGCACTTAACAAAACATATTTTCAGGGAGTTGTTTCAAATGTCCATCTT  
CCTATTACCTTGACATCTCACAAACAAGGCTGGGGTCTTAGTTTACTTGTAACACTTAAATATTAGATGC  
ATGAATGGCTGGCTGTCGATAAAAAGTCAACTACATCAAAGATGGGTTTTAAAGAAAATGGGTTTTAAAGAAA  
ATGATACTTTAAAGAAAATGTC ↑ AAGAACCATTAGTT ↓ AAGGCAAAAAACAAAAGTGATGTCATAGAAAAG  
GAACTAAAGCAGAGTTACAGTTCTTACTTCCCTTCCCCTGGCTTCACCAGTAGGTAGCTGAATGACCTTTG  
GCAACCAATTACTTAAACCGCCCTCTCTAGACAACAATTTTCTCAACTACAAAACAAAAAGTTAAACCAGAT  
GATGTTAATGTCCCTCTCCTCAGCCGAAAATTTCTATTACTCTATGATATCATCCATGGTTTCTAGTGTCA  
GCCAAAACACTATTATTTTTATTATATCATCCACAGTTTCCATATGCCATT

### Filled site:

AGGTAGCATTGTCATTAGAATGCACAGAATTTTTAAATTCTGATTTAGGATGAAAATACTTCAGCTGTTT  
AGTTACATTAACCAGACTTAAATTTCCCATTTGCCAATTTCCAGCAAAGGAAAAATGTTGCTCTCTTGTAGAA  
AGCATGGCATTGTCATAAAATTTTATTTTTAAACAACACTCAAATTTCAAAGCTAAAAAACCAAAGTTATTCTTG  
CAAACCTCTTAAGGCTTATCAAAAAAATTCATTTTTCCCTAGACGATTTAAGTTCAAATTTATTTCAAGG  
TCTGTGATCCACATGAAGTGGCCTAACTCAAGTTCTAATAAATTCACAGTTCAAATTTTCCAAATGAT  
TTTTAAAGTTGACTATTGGTTTCTCAAAGCTGTACATATGGTTTCATTTCGTGCTAAATCAGCAAACCATCTCT  
CTTTATTTTTAAAGCCACCTTTATAGCACTTAACAAAACATATTTTCAGGGAGTTGTTTCAAATGTCCATCTT  
CCTATTACCTTGACATCTCACAAACAAGGCTGGGGTCTTAGTTTACTTGTAACACTTAAATATTAGATGC  
ATGAATGGCTGGCTGTCGATAAAAAGTCAACTACATCAAAGATGGGTTTTAAAGAAAATGGGTTTTAAAGAAA  
ATGATACTTTAAAGAAAATGTCAAGAACCATTAGTTGGGCTGGTGAGATGGCTCAGTGGGTTAGAGCACCCG  
**ACTGCTCTTCCGAAGGTCCAGAGTTCAAATTTCCAGCAACCACATGGTGGCTCACAACCATCCGTAACAAGAT**  
**CTGACTCCCTCTTCTGGAGTGT... [NEOcassette] AAAAAAAAAAAAAAAAAAAAAAAAAAAAAAAAAAATTACAAA**  
**AAAAAAAAAAAAAAAAAAAAAAAAAAAAAAAAAAAAAAAAAAAAAAAAAAAAAAAAAAAAAAAAAAGAACCATTAGTTAAG**  
GCAAAAAACAAAAGTGATGTCATAGAAAAGAGAACTAAAGCAGAGTTACAGTTCTTACTTCCCTTCCCCTG  
GCTTCACCAGTAGGTAGCTGAATGACCTTTGGCAACCAAT
