# Supplementary material for: Rescuing Alu: Recovery of New Inserts Shows LINE-1 Preserves Alu Activity through A-Tail Expansion
Source: PLoS Genet. 2012 Aug 9;8(8):e1002842. doi: 10.1371/journal.pgen.1002842 (PMC3415434; doi:10.1371/journal.pgen.1002842)
Supplement: Table S2 — Genomic features with non-significant difference in median values between Alu inserts containing versus the other windows. (PDF) [file pgen.1002842.s007.pdf]

**Table S2.** Genomic features with non-significant differences in their distributions between Alu insert containing vs. the other windows (203 windows with integrations)

| Genomic feature                     | Medians of the Integration windows | Medians of the Non-Integration windows | Absolute difference in medians | Z-value | p values of MWW test <sup>a</sup> |
|-------------------------------------|------------------------------------|----------------------------------------|--------------------------------|---------|-----------------------------------|
| Decode female <sup>b</sup>          | 1.5270                             | 1.3264                                 | 0.2006                         | 1.97    | 0.0472                            |
| Decode male <sup>b</sup>            | 0.6204                             | 0.5974                                 | 0.023                          | 1.09    | 0.2742                            |
| L1 target <sup>c</sup>              | 1189.5                             | 1249                                   | 59.5                           | -0.79   | 0.0107                            |
| Recombination hotspots <sup>d</sup> | 9                                  | 9                                      | 0                              | -2.73   | 0.4282                            |

\*p = 0.0056 is the cut-off of significance after Bonferroni correction.

a: Two-sided hypothesis test.

b: Sites associated with sex-specific recombination in the female/male germline [1].

c: TTTTAA canonical motif characteristic of target primed reverse transcription of retroelements [2,3].

d: computationally predicted hotspots of recombination using linkage disequilibrium among SNPs [4].

**Details of the genomic features evaluated in Table 2 and Table S2:**

| Category          | Predictor                           | Explanation                                                                                                 | Calculation                                  | Reference  |
|-------------------|-------------------------------------|-------------------------------------------------------------------------------------------------------------|----------------------------------------------|------------|
| Genome landscape  | L1 target (TTTTAA)                  | Motif characteristic of target primed reverse transcription                                                 | count per window                             | [2,3]      |
|                   | SINE count (Alu and Mir)            | All SINE elements in the genome                                                                             | count per window                             | [5]        |
|                   | GC content                          | Reflects local base composition                                                                             | fraction of G and C bases per window         | [5]        |
| Recombination     | Recombination hotspots              | Computationally predicted hotspots of recombination using linkage disequilibrium among SNPs                 | count per window                             | [4]        |
|                   | Decode female/Decode male           | Sex-specific recombination in female or male germline                                                       | rate per window                              | [1]        |
|                   | Genome instability 13-mer frequency | Motif associated with recruiting crossover events at recombination hotspots and cluster at NAHR breakpoints | ratio observed/expected frequency per window | [6]<br>[7] |
| Natural selection | Gene content                        | Protein coding genes likely reflect local natural selection pressure                                        | fraction of bases per window                 | [5]        |
|                   | Most conserved element density      | Regions likely to contain functional elements and reflect local natural selection pressure                  | count per window                             | [8]        |

**Reference List**

1. Kong A, Gudbjartsson DF, Sainz J, Jonsdottir GM, Gudjonsson SA et al. (2002) A high-resolution recombination map of the human genome. Nat Genet 31: 241-247. 10.1038/ng917 [doi];ng917 [pii].
2. Jurka J (1997) Sequence patterns indicate an enzymatic involvement in integration of mammalian retroposons. Proc Natl Acad Sci U S A 94: 1872-1877.

3. Cost GJ, Feng Q, Jacquier A, Boeke JD (2002) Human L1 element target-primed reverse transcription in vitro. *Embo J* 21: 5899-5910.
4. Myers S, Bottolo L, Freeman C, McVean G, Donnelly P (2005) A fine-scale map of recombination rates and hotspots across the human genome. *Science* 310: 321-324. 310/5746/321 [pii];10.1126/science.1117196 [doi].
5. Kvikstad EM, Makova KD (2010) The (r)evolution of SINE versus LINE distributions in primate genomes: sex chromosomes are important. *Genome Res* 20: 600-613. gr.099044.109 [pii];10.1101/gr.099044.109 [doi].
6. Myers S, Freeman C, Auton A, Donnelly P, McVean G (2008) A common sequence motif associated with recombination hot spots and genome instability in humans. *Nat Genet* 40: 1124-1129. 10.1038/ng.213 [doi].
7. McVean G (2010) What drives recombination hotspots to repeat DNA in humans? *Philos Trans R Soc Lond B Biol Sci* 365: 1213-1218. 365/1544/1213 [pii];10.1098/rstb.2009.0299 [doi].
8. Siepel A, Bejerano G, Pedersen JS, Hinrichs AS, Hou M et al. (2005) Evolutionarily conserved elements in vertebrate, insect, worm, and yeast genomes. *Genome Res* 15: 1034-1050. gr.3715005 [pii];10.1101/gr.3715005 [doi].
